# Supplementary material for: Characterization of Hydrophilic Polymers as a Syringe Extrusion 3D Printing Material for Orodispersible Film
Source: MDPI journal article supplement (doi:10.3390/polym13203454), 2021-10-09
Supplement: s1 [file s1]

# Supplementary Materials: Characterization of Hydrophilic Polymers as a Syringe Extrusion 3D Printing Material for Orodispersible Film

Pattaraporn Panraksa <sup>1</sup>, Sheng Qi <sup>2</sup>, Suruk Udomsom <sup>3</sup>, Pratchaya Tipduangta <sup>1</sup>, Pornchai Rachtanapun <sup>4,5</sup>, Kittisak Jantanasakulwong <sup>4,5</sup> and Pensak Jantrawut <sup>1,5,\*</sup>

<sup>1</sup> Department of Pharmaceutical Sciences, Faculty of Pharmacy, Chiang Mai University, Chiang Mai 50200, Thailand; pattaraporn.prs@gmail.com (P.P.); ptipduangta@gmail.com (P.T.)

<sup>2</sup> School of Pharmacy, University of East Anglia, Norwich, Norfolk NR4 7TJ, UK; sheng.qi@uea.ac.uk

<sup>3</sup> Biomedical Engineering Institute, Chiang Mai University, Chiang Mai 50200, Thailand; suruk\_u@cmu.ac.th

<sup>4</sup> Division of Packaging Technology, School of Agro-Industry, Faculty of Agro-Industry, Chiang Mai University, Chiang Mai 50100, Thailand; pornchai.r@cmu.ac.th (P.R.); jantanasakulwong.k@gmail.com (K.J.)

<sup>5</sup> Cluster of Agro Bio-Circular-Green Industry (Agro BCG), Chiang Mai University, Chiang Mai 50100, Thailand

\* Correspondence: pensak.amuamu@gmail.com or pensak.j@cmu.ac.th; Tel.: +6653944309

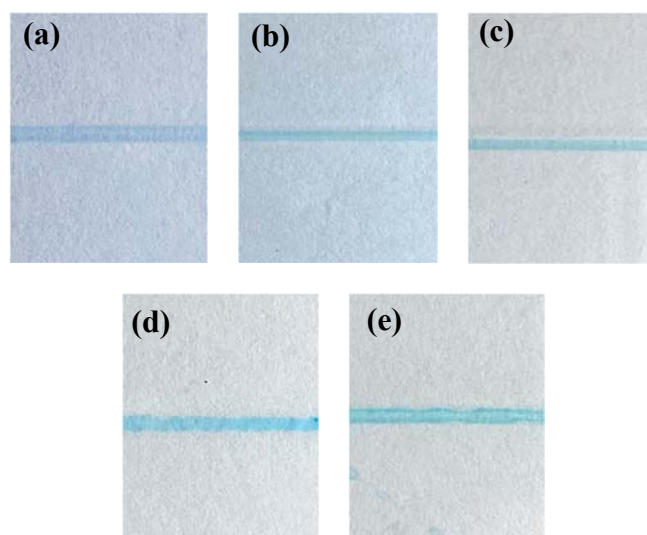

**Figure S1.** Printing filaments of (a) E15-20, (b) E50-15, (c) HMP-15, (d) SCMC-5, and (e) HEC-4.
